# Supplementary material for: Fragile lifespan expansion by dietary mitohormesis in C. elegans
Source: publisher site journal article supplement (doi:10.18632/aging.100863), 2016-01-13
Supplement: Supplementary file [file aging-v8i1-100863-supplementary-material-SD1.pdf]

SUPPLEMENRATY FIGURES

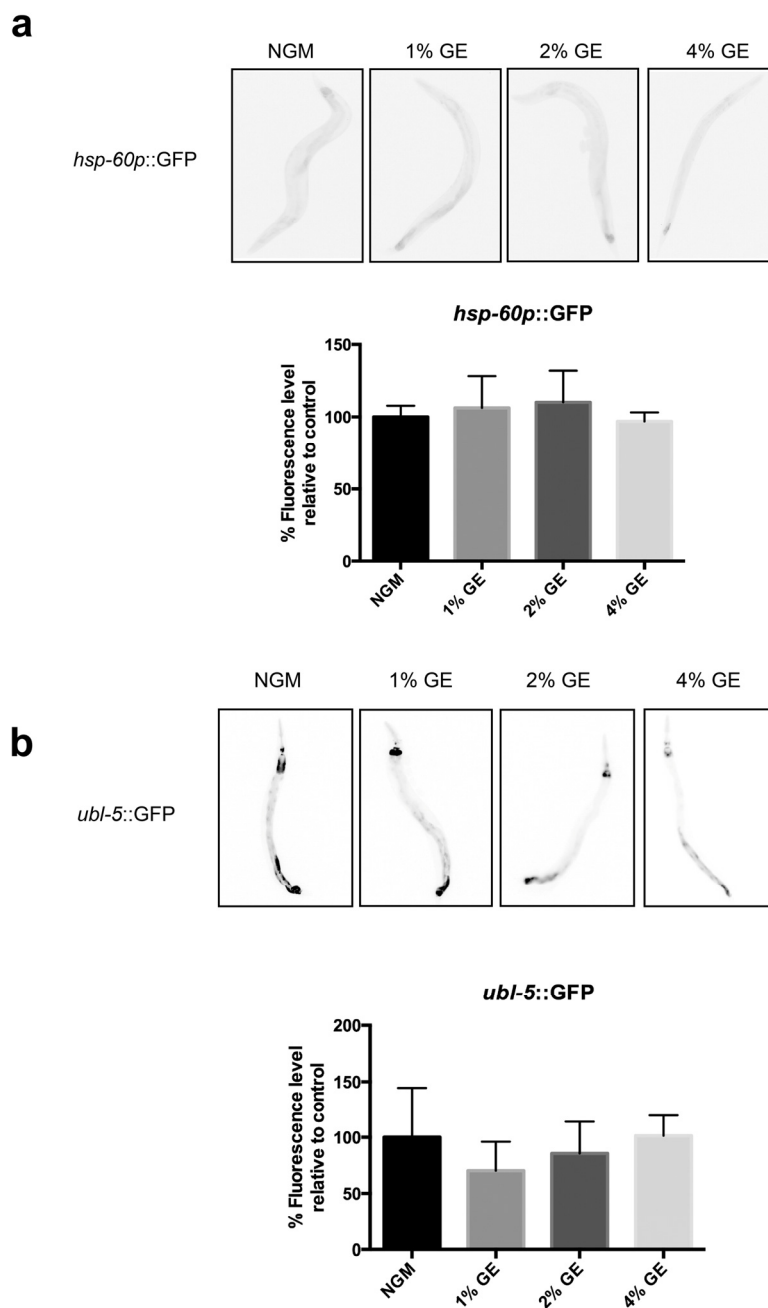

**Supplementary Figure 1. GE doesn't induce HSP-60 and UBL-5 expression. (a-b)** GE fails to induce HSP-60 expression at all GE concentration tested (mean + s.d.). **(c)** Reduction of ATFS-1 expression by RNAi abolishes GE mediated *hsp-6* expression at 2% glucose (mean + s.d.).

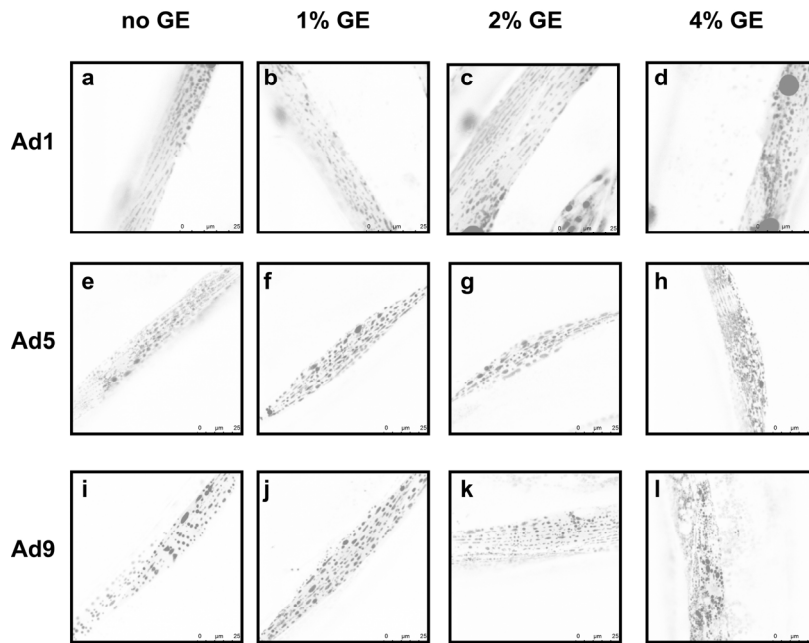

**Supplementary Figure 2. Glucose and aging disrupt mitochondrial morphology.** (a) Untreated animals show linear and uniform mitochondrial signal along muscle fibers. (b-d) High dietary glucose causes premature muscle and mitochondrial organization. (e-l) Loss of linear organization in muscle fibers is age (e, i) and glucose dependent (f-h; g-l), with more pronounced effect at 4% concentration (l).

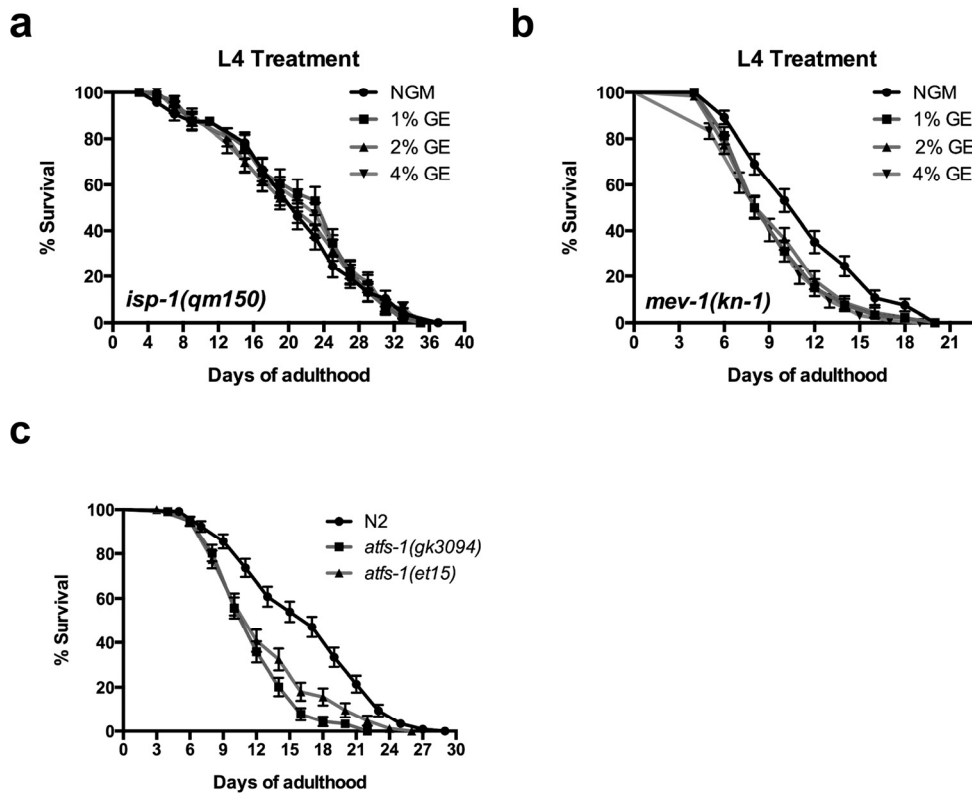

**Supplementary Figure 3. Lifespan extension is dependent on functional ETC and oxidative stress.** (a-b) GE until L4 stage failed to increase lifespan of *isp-1(qm150)* and *mev-1(kn-1)* mutants. (c) *atfs-1(et15)* and *atfs-1(gk3094)* mutants have reduced lifespans compared to N2 animals ( $P < 0.0001$  compared to control).

Supplementary Table 1

| Figure                                   | Strains                                    | Mean lifespan                  | pValue      | 75th percentile (days) | maximum lifespan | Total number of death/total |
|------------------------------------------|--------------------------------------------|--------------------------------|-------------|------------------------|------------------|-----------------------------|
| Fig. 2                                   | EV                                         | 17                             |             | 20                     | 29               | 373/383                     |
|                                          | + 2% GE                                    | 17                             | n.s. 0.3862 | 18                     | 29               | 404/412                     |
|                                          | + 4% GE                                    | 13                             | <0.0001     | 17,5                   | 24               | 215/219                     |
|                                          | ATFS-1 RNAi                                | 14                             |             | 19                     | 25               | 357/373                     |
|                                          | + 2% GE                                    | 13                             | 0.0019      | 15                     | 25               | 441/449                     |
|                                          | + 4% GE                                    | 11                             | <0.0001     | 17                     | 21               | 213/218                     |
|                                          | DVE-1 RNAi                                 | 13                             |             | 20                     | 24               | 245/251                     |
|                                          | + 2% GE                                    | 11                             | <0.0001     | 23,5                   | 16               | 290/292                     |
|                                          | + 4% GE                                    | 13                             | 0.0105      | 23,5                   | 15               | 103/106                     |
|                                          | UBL-5 RNAi                                 | 14                             |             | 49,5                   | 25               | 185/192                     |
|                                          | + 2% GE                                    | 12                             | <0.0001     | 30                     | 19               | 207/207                     |
|                                          | + 4% GE                                    | 13                             | <0.0001     | 34                     | 15               | 101/106                     |
|                                          | Fig. 3                                     | N2 Full life Treatment (FL) 0% | 17          |                        | 18               | 24                          |
| N2 FL 1%                                 |                                            | 16                             | n.s. 0.7242 | 19                     | 27               | 138/142                     |
| N2 FL 2%                                 |                                            | 16                             | 0.0448      | 18                     | 27               | 112/114                     |
| N2 FL 4%                                 |                                            | 14                             | <0.0001     | 15                     | 22               | 123/124                     |
| N2 L4 Treatment (L4) 0%                  |                                            | 16                             |             | 20                     | 28               | 130/140                     |
| N2 L4 1%                                 |                                            | 18                             | n.s. 0.6619 | 19                     | 28               | 132/144                     |
| N2 L4 2%                                 |                                            | 21                             | <0.0001     | 25                     | 32               | 102/142                     |
| N2 L4 4%                                 |                                            | 22                             | <0.0001     | 23                     | 30               | 131/152                     |
| N2                                       |                                            | 20                             |             | 21                     | 31               | 108/120                     |
| N2 adult Treatment (Ad) 1                |                                            | 14                             | <0.0001     | 17                     | 23               | 103/120                     |
| N2 Ad 3                                  |                                            | 15                             | <0.0001     | 16                     | 25               | 113/120                     |
| N2 Ad 5                                  |                                            | 16                             | <0.0001     | 18                     | 23               | 104/119                     |
| N2 Ad 9                                  |                                            | 16                             | <0.0001     | 20                     | 27               | 97/118                      |
| <i>atfs-1(et15)</i> L4 Treatment (L4) 0% |                                            | 13                             |             | 18,5                   | 28               | 119/145                     |
| <i>atfs-1(et15)</i> L4 1%                |                                            | 11                             | <0.0001     | 15                     | 24               | 105/129                     |
| <i>atfs-1(et15)</i> L4 2%                |                                            | 9                              | <0.0001     | 12                     | 24               | 115/144                     |
| <i>atfs-1(et15)</i> L4 4%                |                                            | 9                              | <0.0001     | 12                     | 20               | 117/136                     |
| Fig. 3                                   | <i>atfs-1(gk3094)</i> L4 Treatment (L4) 0% | 17                             |             | 18                     | 25               | 109/116                     |
|                                          | <i>atfs-1(gk3094)</i> L4 1%                | 17                             | 0.0016      | 18                     | 25               | 115/119                     |
|                                          | <i>atfs-1(gk3094)</i> L4 2%                | 17                             | n.s. 0.0606 | 20                     | 25               | 115/119                     |
|                                          | <i>atfs-1(gk3094)</i> L4 4%                | 16                             | n.s. 0.0750 | 20                     | 26               | 109/120                     |
|                                          | N2 L4 0%                                   | 14                             |             | 17                     | 27               | 102/120                     |
|                                          | N2 L4 2%                                   | 17                             | <0.0001     | 20                     | 32               | 101/120                     |
|                                          | N2 L4 2% + NAC 10 mM                       | 13                             | n.s. 0.8417 | 17                     | 30               | 92/113                      |
| Fig. 3                                   | N2 no GE                                   | 19                             |             | 22                     | 27               | 100/120                     |
|                                          | + <i>cco-1</i> RNAi Ad1                    | 21                             | n.s. 0.2189 | 22                     | 29               | 119/120                     |
|                                          | + <i>cco-1</i> RNAi Ad1                    | 19                             | n.s. 0.4701 | 22                     | 33               | 113/120                     |
|                                          | + <i>cco-1</i> RNAi Ad5                    | 21                             | 0.0043      | 24                     | 31               | 120/120                     |
|                                          | + <i>cco-1</i> RNAi Ad9                    | 21                             | 0.0238      | 24                     | 29               | 114/120                     |
|                                          | N2 1% GE L4                                | 19                             |             | 24                     | 29               | 106/120                     |

|                         |                           |                   |                   |    |         |         |
|-------------------------|---------------------------|-------------------|-------------------|----|---------|---------|
| Fig. 4                  | N2 no GE                  | 19                |                   | 22 | 27      | 100/120 |
|                         | + <i>cco-1</i> RNAi Ad1   | 21                | n.s. 0.2189       | 22 | 29      | 119/120 |
|                         | + <i>cco-1</i> RNAi Ad1   | 19                | n.s. 0.4701       | 22 | 33      | 113/120 |
|                         | + <i>cco-1</i> RNAi Ad5   | 21                | <b>0.0043</b>     | 24 | 31      | 120/120 |
|                         | + <i>cco-1</i> RNAi Ad9   | 21                | <b>0.0238</b>     | 24 | 29      | 114/120 |
|                         |                           |                   |                   |    |         |         |
|                         | N2 1% GE L4               | 19                |                   | 24 | 29      | 106/120 |
|                         | + <i>cco-1</i> RNAi Ad1   | 19                | n.s. 0.7372       | 18 | 33      | 122/122 |
|                         | + <i>cco-1</i> RNAi Ad1   | 19                | n.s. 0.4883       | 22 | 29      | 118/120 |
|                         | + <i>cco-1</i> RNAi Ad5   | 17                | <b>0.0322</b>     | 22 | 29      | 111/120 |
|                         | + <i>cco-1</i> RNAi Ad9   | 17                | n.s. 0.0871       | 22 | 31      | 113/120 |
|                         |                           |                   |                   |    |         |         |
|                         | N2 2% GE L4               | 19                |                   | 24 | 31      | 113/120 |
|                         | + <i>cco-1</i> RNAi Ad1   | 17                | <b>0.0008</b>     | 18 | 31      | 120/120 |
|                         | + <i>cco-1</i> RNAi Ad1   | 19                | n.s. 0.5849       | 24 | 29      | 116/120 |
|                         | + <i>cco-1</i> RNAi Ad5   | 19                | n.s. 0.2594       | 24 | 29      | 104/120 |
|                         | + <i>cco-1</i> RNAi Ad9   | 17                | n.s. 0.0601       | 22 | 31      | 118/120 |
|                         |                           |                   |                   |    |         |         |
|                         | N2 4% GE L4               | 19                |                   | 24 | 33      | 106/120 |
|                         | + <i>cco-1</i> RNAi Ad1   | 17                | <b>&lt;0.0001</b> | 18 | 25      | 116/120 |
| + <i>cco-1</i> RNAi Ad1 | 21                        | n.s. 0.7436       | 24                | 31 | 120/120 |         |
| + <i>cco-1</i> RNAi Ad5 | 21                        | n.s. 0.5512       | 24                | 33 | 110/120 |         |
| + <i>cco-1</i> RNAi Ad9 | 21                        | n.s. 0.9602       | 24                | 33 | 103/120 |         |
|                         |                           |                   |                   |    |         |         |
| N2 no GE                | 19                        |                   | 22                | 27 | 100/120 |         |
| N2 1% GE L4             | 19                        | n.s. 0.1968       | 24                | 29 | 106/120 |         |
| N2 2% GE L4             | 19                        | n.s. 0.0612       | 24                | 31 | 113/120 |         |
| N2 4% GE L4             | 19                        | <b>0.0057</b>     | 24                | 33 | 106/120 |         |
|                         |                           |                   |                   |    |         |         |
| Supp. Fig. 3            | <i>isp-1(qm150)</i> L4 0% | 21                |                   | 25 | 37      | 81/116  |
|                         | <i>isp-1(qm150)</i> L4 1% | 25                | n.s. 0.9551       | 26 | 35      | 63/87   |
|                         | <i>isp-1(qm150)</i> L4 2% | 21                | n.s. 0.8744       | 26 | 35      | 99/118  |
|                         | <i>isp-1(qm150)</i> L4 4% | 23                | n.s. 0.6732       | 26 | 35      | 102/118 |
|                         |                           |                   |                   |    |         |         |
|                         | <i>mev-1(kn-1)</i> L4 0%  | 12                |                   | 14 | 20      | 97/119  |
|                         | <i>mev-1(kn-1)</i> L4 1%  | 8                 | <b>&lt;0.0001</b> | 11 | 20      | 102/120 |
|                         | <i>mev-1(kn-1)</i> L4 2%  | 10                | <b>&lt;0.0001</b> | 11 | 20      | 101/120 |
|                         | <i>mev-1(kn-1)</i> L4 4%  | 9                 | <b>&lt;0.0001</b> | 10 | 19      | 104/120 |
|                         |                           |                   |                   |    |         |         |
| N2                      | 17                        |                   | 20                | 29 | 117/121 |         |
| <i>atfs-1(gk3094)</i>   | 12                        | <b>&lt;0.0001</b> | 13                | 22 | 99/116  |         |
| <i>atfs-1(et15)</i>     | 12                        | <b>&lt;0.0001</b> | 15                | 26 | 93/120  |         |
